# Supplementary material
Source: PubMed Central journal article supplement (PMC4214522)
Supplement: ASN.2013080901_ASN2013080901SupplementaryData.pdf [file ASN.2013080901_ASN2013080901SupplementaryData.pdf]

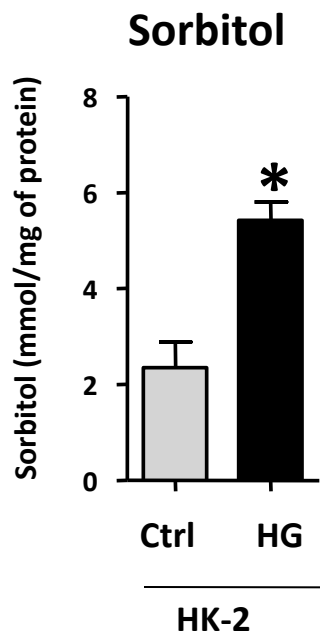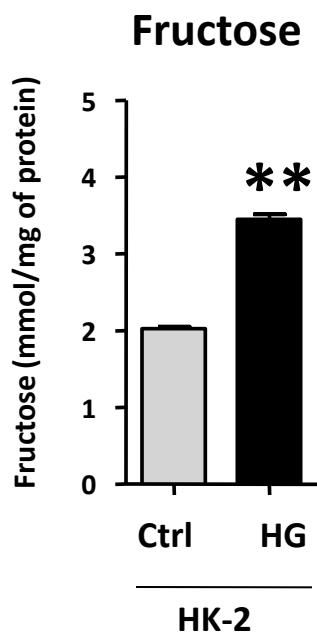

**Supplemental Figure 1. Intracellular sorbitol and fructose levels in control (Cntrl) HK2 cells and cells exposed to high glucose (HG) conditions. \*  $P < 0.05$  and \*\*  $P < 0.01$  vs. control.**

|                  | Forward Primer 5'-3'    | Reverse Primer 5'-3'     |
|------------------|-------------------------|--------------------------|
| <b>Human</b>     |                         |                          |
| Aldose reductase | CAGGTGGTGAAGCGTGAG      | GAATAAGGTAGAGGTCCAGGT    |
| MCP-1            | GCAAAGACCCTCAAACATCC    | AGATACAGAGACTTGGGGAAA    |
| IL1 $\beta$      | CACGATGCACCTGTACGATCA   | GTTGCTCCATATCCTGTCCCT    |
| IL6              | CATGGGCACCTCAGATTG      | GTGTCCTAACGCTCATACTT     |
| <b>Mouse</b>     |                         |                          |
| Aldose reductase | CTATTTCCCACTGGATGCCTCAG | TTTCACCAAACCTTCATCCACTAG |
| KHK-A            | TTGCCGATTTTGTCTGGAT     | CCTCGGTCTGAAGGACCACAT    |
| KHK-C            | TGGCAGAGCCAGGGAGAT      | ATCTGGCAGGTTCTGTGTCGTA   |
| IL1 $\beta$      | ATCTCGCAGCAGCACATC      | CCAGCAGGTTATCATCACATC    |
| IL6              | ACCGCTATGAAGTTCCTCTC    | CCTCTGTGAAGTCTCCTCTC     |
| ccl2             | GGTCTTGAGCACCTTGAATG    | ATTAAGGCATCACAGTCCCAG    |
| cd68             | TGTGCTTTCTGTGGCTGTAG    | GTGTCTGATCTTGCTAGGACC    |
| F4/80            | TGAATGACTGCCACAGTACG    | CCATCTGTACATCCCCTGAAG    |
| iNOS             | CCAAGCCCTCACCTACTTCC    | CTCTGAGGGCTGACACAAGG     |
| Arg1             | CTCCAAGCCAAAGTCCTTAGAG  | AGGAGCTGTCATTAGGGACATC   |
